# Supplementary material for: Genetic characterization of a novel picorna-like virus in Culex spp. mosquitoes from Mozambique
Source: PubMed Central journal article supplement (PMC5907373; doi:10.1186/s12985-018-0981-z), 2018-04-18
Supplement: 12985_2018_981_MOESM1_ESM.pdf [file 12985_2018_981_MOESM1_ESM.pdf]

Supplementary Table 1. Primers used in this study.

| Primer name              | Primer sequence 5' to 3'                          |
|--------------------------|---------------------------------------------------|
| 5'RACE 3R                | CTC TAC AGG TAT ATT CGA TCT G                     |
| 5'RACE 3R nest           | TCT TCT AAT CCC TGC ACC TTC                       |
| 5'RACE 2R                | CTC AGC TGC TCC TAC CAC AG                        |
| 5'RACE 2R nest           | CTC AAA CCT AGT AAA TCT CTA GG                    |
| 5'RACE 1R                | AAG CCT CAA CAC TCA AGT ATG                       |
| 5'RACE 1R nest           | CAC GTA TGC CAG GAT TTG TTC                       |
| 1F                       | GAA CAA ATC CTG GCA TAC GTG                       |
| 1R                       | CCCA GAA CTC ACT ATA GCT AC                       |
| 2F                       | GGT TCT CAA CTC TGG AGT TGG                       |
| 2R                       | AAT AAC CTG CGG TGG ATA CAC                       |
| 3F                       | CCC AGT ATC AGG CTC TTC AAC                       |
| 3R                       | GTC CAT TGA ACC ACT CGG AG                        |
| 4F                       | ATG GAC ATC TTG CTA TAT GGT G                     |
| 4R                       | TCT ATT CTC ACG CTT GGT CAC                       |
| 5F                       | CCT GGA CTT CAT TAG CAC AAG                       |
| 5R                       | TAG AGT CAT ATT GGA TCC ATC C                     |
| 6F                       | ATT GTC AGA GGT ACC TTG TAT C                     |
| 6R                       | CTC TAG AAT TAG TGG CTG TCG                       |
| 7F                       | TGT GTT GGA GAT AGG ATC TGC                       |
| 7R                       | ACA ATC TAG TGC CTC CTT CTG                       |
| 8F                       | CGA CCT AGG ACT TAT CCA GC                        |
| 8R                       | CTC CGT AAA CAC AAG CAG TAA C                     |
| 9F                       | AAT CCC GAA TCA CCA GAA TGG                       |
| 9R                       | TGC AGA TAT CAT AGT CCT ACT C                     |
| 5' RACE AAP-FP           | GGC CAC GCG TCG ACT AGT ACG GGG GGG GGG           |
| 5' RACE AUAP-FP          | GGC CAC GCG TCG ACT AGT AC                        |
| 3' RACE UAP              | GGC CAC GCG TCG ACT AGT AC                        |
| poly (A) specific primer | GGC CAC GCG TCG ACT AGT ACT TTT TTT TTT TTT TTT T |
