# Supplementary material for: Genetic characterization of a novel picorna-like virus in Culex spp. mosquitoes from Mozambique
Source: PubMed Central journal article supplement (PMC5907373; doi:10.1186/s12985-018-0981-z), 2018-04-18
Supplement: 12985_2018_981_MOESM3_ESM.pdf [file 12985_2018_981_MOESM3_ESM.pdf]

**Supplementary Table 2:** The pairwise amino acid identity matrix of CuPV-1 with other iflaviruses. Upper right values correspond to the % identity of RdRP I-VIII conserved domains (2743-3041 amino acid positions in CuPV-1) and lower left values correspond to the complete polyprotein.

|         | CuPV-1 | SBV  | VDV-1 | DWV  | IFV  | HplV-35 | LJV  | MV   | SBPV | ArIV |
|---------|--------|------|-------|------|------|---------|------|------|------|------|
| CuPV-1  | ***    | 33   | 29.5  | 28.8 | 23.7 | 57.2    | 34.9 | 32.4 | 30.8 | 34   |
| SBV     | 20     | ***  | 45.5  | 46.5 | 34.3 | 37.9    | 56.1 | 44.6 | 41   | 41.3 |
| VDV-1   | 14.1   | 18.4 | ***   | 95.8 | 35.3 | 31.5    | 45.8 | 51.9 | 48.4 | 47.8 |
| DWV     | 13.8   | 18.6 | 95.2  | ***  | 35.3 | 32.5    | 47.1 | 51.6 | 48.7 | 47.8 |
| IFV     | 14.8   | 16   | 14.7  | 14.8 | ***  | 24.1    | 32.7 | 33   | 33.7 | 35.3 |
| HplV-35 | 38.4   | 24   | 16.5  | 16.9 | 15.9 | ***     | 36.3 | 34.7 | 32.8 | 32.2 |
| LJV     | 20.6   | 33.7 | 17.7  | 18   | 15.7 | 23.3    | ***  | 43.3 | 40.7 | 44.9 |
| MV      | 14.5   | 17.6 | 26.4  | 26.3 | 15.4 | 16.8    | 15.8 | ***  | 67.6 | 49   |
| SBPV    | 15.2   | 16.9 | 26.7  | 26.9 | 15.5 | 17.1    | 16   | 45.5 | ***  | 44.6 |
| ArIV    | 14.5   | 16.2 | 19.3  | 19.4 | 14.2 | 14.6    | 16.4 | 18.9 | 18   | ***  |
