# Supplementary material for: Genetic characterization of a novel picorna-like virus in Culex spp. mosquitoes from Mozambique
Source: Springer Nature journal article supplement (doi:10.1186/s12985-018-0981-z), 2018-04-18
Supplement: MOESM2 [file 15703518]

A. 1C (VP3)

WxGxxxxxxxxVxxxxHxxxxxxxxxP

|                |     |                                                |
|----------------|-----|------------------------------------------------|
| <b>CuPV-1</b>  | 734 | MHTTVAIVSSGFTNYSGGMILCGQFVKTMPEKASIEVA-IRFGR   |
| <b>SBV</b>     | 526 | QITPEMEYVTGLYNFWSGPIELRFDFVSNARHTGTVIIS-AEYNR  |
| <b>VDV-1</b>   | 588 | WFAPVGVVSSMFMQWRGSLEYRFEDIASQREHTGRLLVGYVPLGT  |
| <b>DWV</b>     | 588 | WFAPVGVVSSMFMQWRGSLEYRFEDIASQREHTGRLLVGYVPLGT  |
| <b>MV</b>      | 597 | TVPPIGVVSSLFCYWRGSIDFKFEIIATSKEHTGRLLVAYIPGIV  |
| <b>SBPV</b>    | 569 | YLPPIISVVSSLYAYTRGSIKYKELFGNNPRENARLLVAYIPGIS  |
| <b>Hp1V-35</b> | 591 | LSSPLGVAASFYTNYFGTMELYFQFVKTOYHKGSVEVA-IHFGR   |
| <b>LJV</b>     | 530 | VPTPLEYIISMYQFWSGPLEVRLDFVSNARHTGSIMLS-AEFGR   |
| <b>IFV</b>     | 573 | VLPVVTYIISQLFQGYTGELEYEFIPVKTAENFSIIVAFVDFDG   |
| <b>FMDV</b>    | 591 | SNTFLAGLAQYYAQYSGTINLHFMTGPTDAKARYMWAYAPPGM    |
| <b>EMCV</b>    | 483 | ANTEFLAALSRRNFAQYRGSIVYTFVFTGTAMMKGKFLIAYTPPGA |
| <b>ArIFV</b>   | 583 | YVPEIGVVSSFFENYKGSIVYDIIAAMTDRENIKLMFGVETPI    |

. : : \* : . ..

B. 1D (VP1)

|                |      |                       |                |      |                                |
|----------------|------|-----------------------|----------------|------|--------------------------------|
|                |      | <u>FxRG</u>           |                |      | <u>DDFxxxxxxxxGxP</u>          |
| <b>CuPV-1</b>  | 1040 | G---MFSGSLAMTIIIVDEG- | <b>CuPV-1</b>  | 1182 | ----KISVLLNMGDDFELGGFLCHPGFPNI |
| <b>SBV</b>     | 850  | R---FWRGSLRYTIIHSTD   | <b>SBV</b>     | 962  | ----YMSVWVEAGDDFEVSNFYGPSSVKTN |
| <b>VDV-1</b>   | 1001 | R---FYRGDLRFKIVFPSNV  | <b>VDV-1</b>   | 1120 | ----PVTIYYSIGDGMQFSQWVGYQPMML  |
| <b>DWV</b>     | 1001 | R---FYRGDLRYKIVFPSNV  | <b>DWV</b>     | 1120 | ----PVTIYYSIGDGMQFSQWVGYQPMML  |
| <b>MV</b>      | 1040 | R---FYRGGVRFRIVI-TGL  | <b>MV</b>      | 1151 | ----DIAIYYTISDDCSFNVFCGFEDMVFC |
| <b>SBPV</b>    | 987  | R---YFRGGLRLRIIVV-EGL | <b>SBPV</b>    | 1103 | ----EISVYYSIADDFSFNIFCGEPPMVYC |
| <b>Hp1V-35</b> | 901  | G---MFRGVSYYTIVLKSGI  | <b>Hp1V-35</b> | 1037 | ----AVDVYVNCDDFELGGFLCHPGLANP  |
| <b>LJV</b>     | 960  | R---FWRGSRYSIISHRVT   | <b>LJV</b>     | 1073 | ----TCDIFWSAGDDFDVKNFLGPPVPIAP |
| <b>IFV</b>     | 878  | R---FGRGSVILSIL--NHS  | <b>IFV</b>     | 1021 | GLQSTVTIRMGLSDDSKFHFMCTPPVIAN  |
| <b>FMDV</b>    | 791  | RASYFYFSDLEIAV---KHE  | <b>FMDV</b>    | 896  | ----VNELLYRMK---RAETYC-PRLLAI  |
| <b>EMCV</b>    | 742  | SPFVYYKCDLEVTLSPHTSG  | <b>EMCV</b>    | 858  | ----KFTVYLRYNK---RVFCPRPTVFFP  |
| <b>ArIFV</b>   | 994  | KSCIGFKGSIIILHALFPSTP | <b>ArIFV</b>   | 1111 | ----RTVIMRSFGDDAALYLERCFPPVVFF |

. : :
